# Supplementary material
Source: PubMed Central journal article supplement (PMC3151148)
Supplement: NIHMS309963-supplement-1_si_001.pdf [file NIHMS309963-supplement-1_si_001.pdf]

# **FRET-FCS Detection of Intra-lobe Dynamics in Calmodulin**

*E. Shane Price<sup>†</sup>, Marek Aleksiejew and Carey K. Johnson<sup>\*</sup>*

Department of Chemistry, University of Kansas, Lawrence, KS 66045

## **Supporting Information**

\*Corresponding author.

<sup>†</sup>Present address: Department of Chemistry, William Jewell College, Liberty, MO 64068

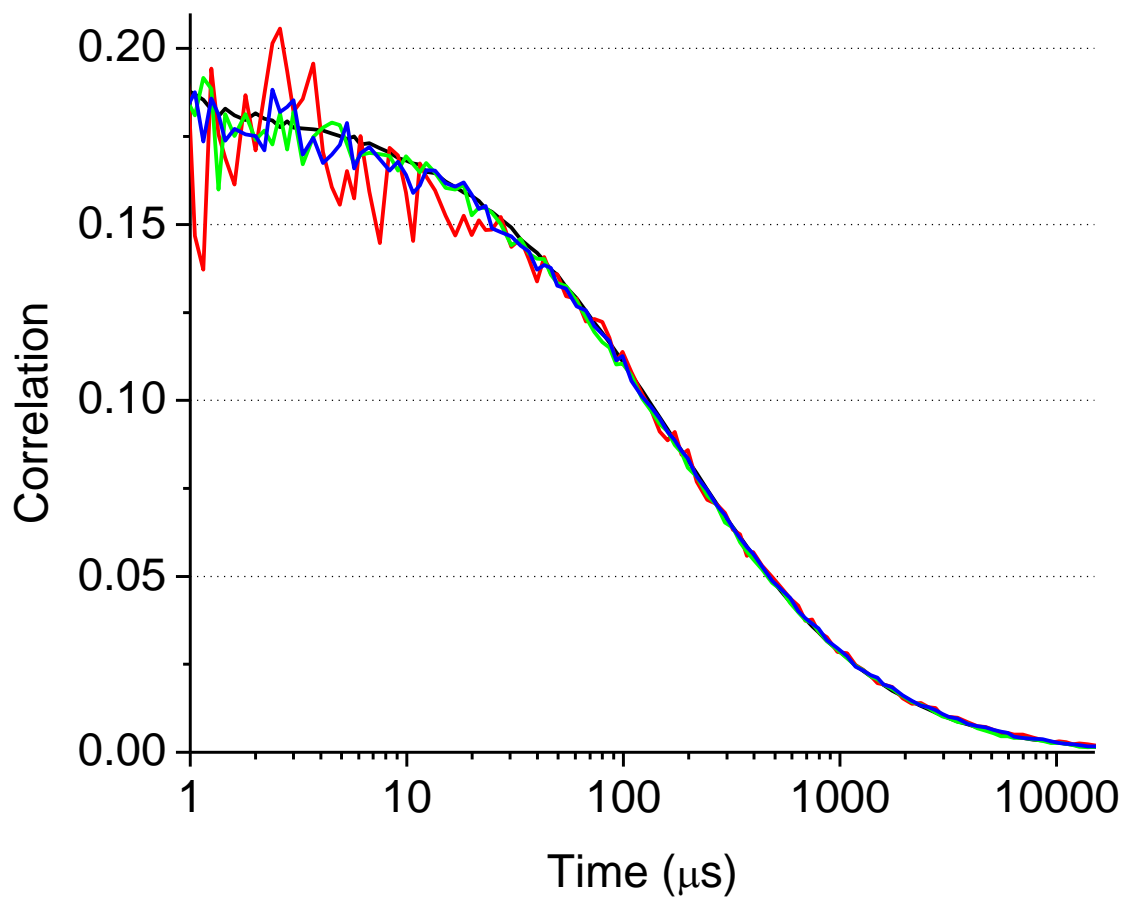

**Figure S1.** Correlation functions for polyproline-AF488-Atto 740 normalized to show overlap of the time dependence of the four correlation functions.  $G_{GG}(\tau)$  (black),  $G_{RR}(\tau)$  (red),  $G_{GR}(\tau)$  (green), and  $G_{RG}(\tau)$  (blue).

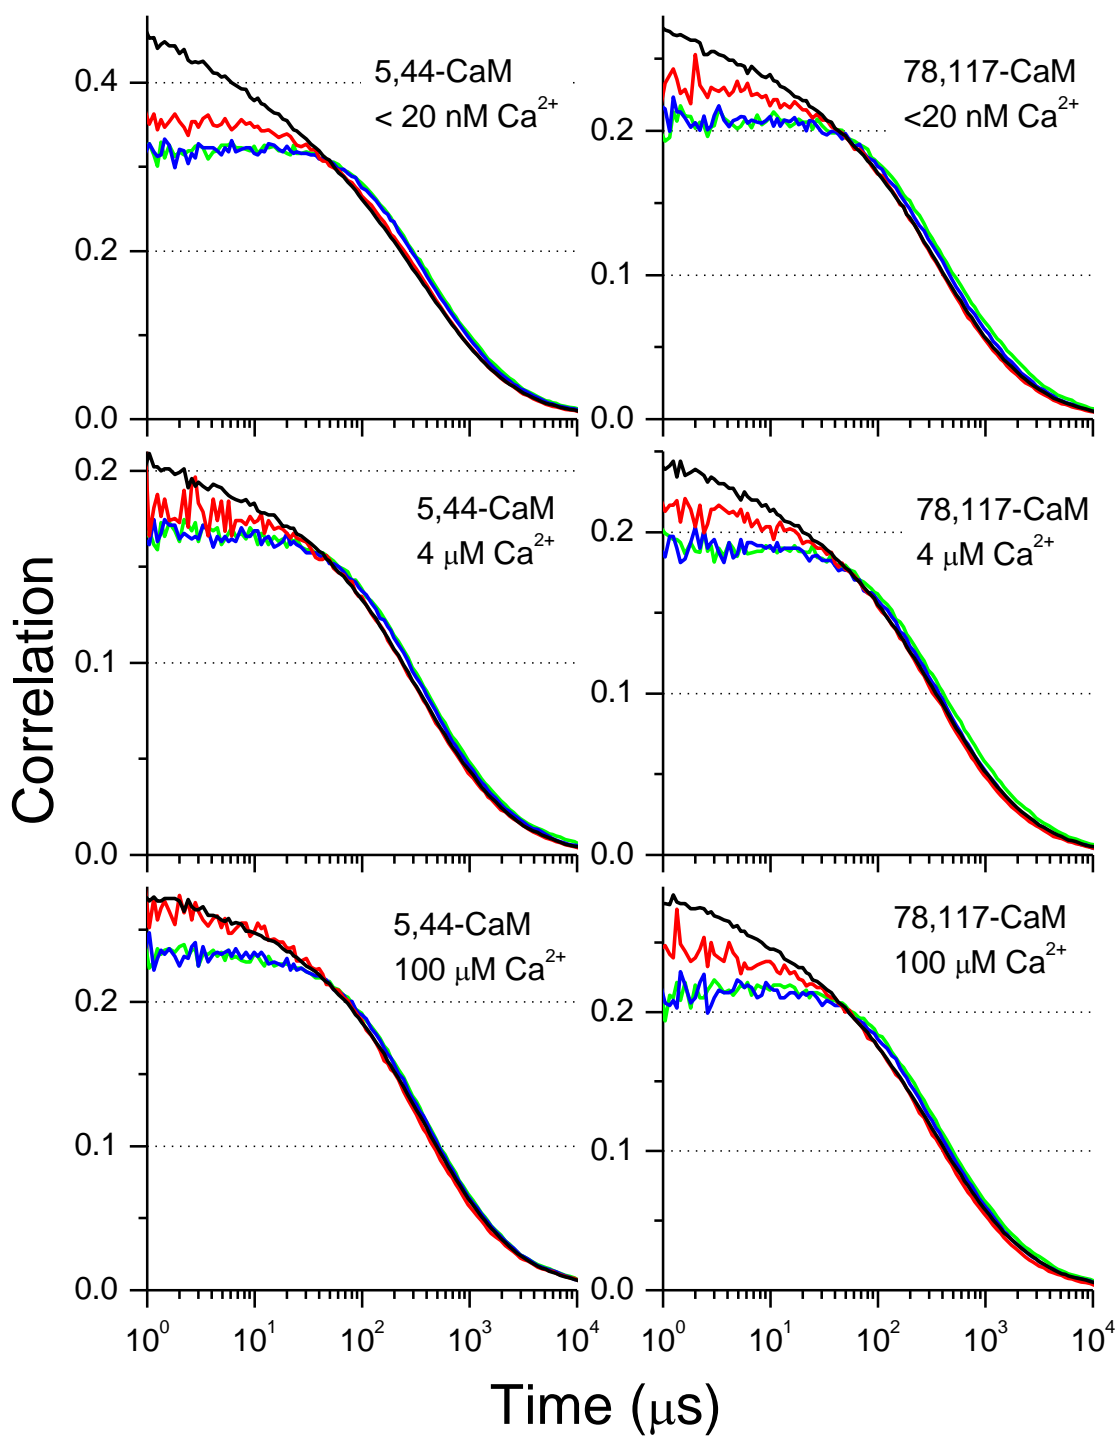

**Figure S2.** Correlation functions for CaM-AF488-Atto 740 scaled to  $G_{GG}(\tau)$  at  $\tau = 50 \mu\text{s}$ .  $G_{GG}(\tau)$  (black),  $G_{RR}(\tau)$  (red),  $G_{GR}(\tau)$  (green), and  $G_{RG}(\tau)$  (blue). The shift between autocorrelations and cross-correlation functions indicating intramolecular fluctuations is most visible for 5,44-CaM in the low-Ca<sup>2+</sup> correlations.
